# Supplementary material
Source: PubMed Central journal article supplement (PMC3030128)
Supplement: NIHMS256304-supplement-Web_appendices.pdf [file NIHMS256304-supplement-Web_appendices.pdf]

Supplementary Materials for

**Semiparametric Transformation Models With Random Effects for  
Joint Analysis of Recurrent and Terminal Events**

Donglin Zeng\* and D. Y. Lin

Web Appendix A

*EM Algorithm*

For simplicity, we consider the common setting of time-independent covariates. In the E-step, we calculate the conditional expectation of  $g(b_i)$  given the observed data for some function  $g(\cdot)$ . We denote such conditional expectation by  $\widehat{E}[g(b_i)]$ . In view of the expression of the likelihood function,  $\widehat{E}[g(b_i)]$  is equal to  $\int_b g(b)\Gamma_i(b)f(b; \gamma)db / \int_b \Gamma_i(b)f(b; \gamma)db$ , where

$$\begin{aligned} \Gamma_i(b) = & \exp \left\{ b^T \left( \sum_t R_i(t) \Delta N_i^*(t) \tilde{Z}_i + \Delta_i(\phi \circ \tilde{Z}_i) \right) \right\} \\ & \times \exp \left\{ \int \log H'(e^{\alpha^T Z_i + b^T \tilde{Z}_i} A(t)) R_i(t) dN_i^*(t) + \Delta_i \log G'(e^{\beta^T Z_i + b^T(\phi \circ \tilde{Z}_i)} \Lambda(Y_i)) \right\} \\ & \times \exp \left\{ -H(e^{\alpha^T Z_i + b^T \tilde{Z}_i} A(Y_i)) - G(e^{\beta^T Z_i + b^T(\phi \circ \tilde{Z}_i)} \Lambda(Y_i)) \right\}. \end{aligned}$$

The integrations in both the numerator and the denominator are evaluated through numerical approximations, such as the Gaussian-quadrature approximation when  $b_i$  is normal.

In the M-step, we maximize the following function

$$\begin{aligned} & \sum_{i=1}^n \left[ \int R_i(t) \left\{ \log A\{t\} + \alpha^T Z_i + \widehat{E}[b_i]^T \tilde{Z}_i + \widehat{E}[\log H'(e^{\alpha^T Z_i + b_i^T \tilde{Z}_i} A(Y_i))] \right\} dN_i^*(t) \right. \\ & \quad \left. - \widehat{E}[H(e^{\alpha^T Z_i + b_i^T \tilde{Z}_i} A(Y_i))] \right] \\ & + \sum_{i=1}^n \left[ \Delta_i \left\{ \log \Lambda\{Y_i\} + \beta^T Z_i + \widehat{E}[b_i]^T (\phi \circ \tilde{Z}_i) + \widehat{E}[\log G'(e^{\beta^T Z_i + b_i^T(\phi \circ \tilde{Z}_i)} \Lambda(Y_i))] \right\} \right. \\ & \quad \left. - \widehat{E}[G(e^{\beta^T Z_i + b_i^T(\phi \circ \tilde{Z}_i)} \Lambda(Y_i))] \right] + \sum_{i=1}^n \widehat{E}[\log f(b_i; \gamma)]. \end{aligned} \quad (A1)$$

Let  $t_{11} < t_{21} < t_{31} < \dots < t_{n_1,1}$  be the ordered time points where recurrent events are observed, and let  $a_1, a_2, a_3, \dots, a_{n_1}$  be the jump sizes of  $A$  at those time points. Similarly, let

$t_{12} < t_{22} < t_{32} < \dots < t_{n_2,2}$  be the ordered terminal event times, and let  $\lambda_1, \lambda_2, \lambda_3, \dots, \lambda_{n_2}$  be the jump sizes of  $\Lambda$  at those time points. By differentiating (A1) with respect to  $a_k$  and setting the derivative to be zero, we obtain

$$\begin{aligned} \frac{1}{a_k} + \sum_{i=1}^n \widehat{E} \left\{ \int R_i(t) I(t \geq t_{k1}) \frac{e^{\alpha^T Z_i + b_i^T \widetilde{Z}_i} H''(e^{\alpha^T Z_i + b_i^T \widetilde{Z}_i} A(t))}{H'(e^{\alpha^T Z_i + b_i^T \widetilde{Z}_i} A(t))} dN_i^*(t) \right. \\ \left. - I(Y_i \geq t_{k1}) e^{\alpha^T Z_i + b_i^T \widetilde{Z}_i} H'(e^{\alpha^T Z_i + b_i^T \widetilde{Z}_i} A(Y_i)) \right\} = 0, \end{aligned}$$

where  $H''(x) = dH^2(x)/dx^2$ . Thus,

$$\begin{aligned} \frac{1}{a_{k+1}} = \frac{1}{a_k} + \sum_{i=1}^n \left\{ \int R_i(t) I(t_{k1} \leq t < t_{k+1,1}) \frac{e^{\alpha^T Z_i + b_i^T \widetilde{Z}_i} H''(e^{\alpha^T Z_i + b_i^T \widetilde{Z}_i} A(t))}{H'(e^{\alpha^T Z_i + b_i^T \widetilde{Z}_i} A(t))} dN_i^*(t) \right. \\ \left. - I(t_{k1} \leq Y_i < t_{k+1,1}) e^{\alpha^T Z_i + b_i^T \widetilde{Z}_i} H'(e^{\alpha^T Z_i + b_i^T \widetilde{Z}_i} A(Y_i)) \right\}. \end{aligned} \quad (A2)$$

Since  $A(t) = a_1 + \dots + a_k$  for  $t$  between  $t_{k1}$  and  $t_{k+1,1}$ , equation (A2) provides a forward recursive formula for calculating  $a_{k+1}$  from  $a_1, \dots, a_k$ . To obtain a backward recursive formula, we let  $\theta_1 = A(t_{n_1,1})$  and redefine  $f_{k1} = a_k/\theta_1$ . Then  $\sum_k f_{k1} = 1$ , and the above equation becomes

$$\begin{aligned} \frac{1}{f_{k1}} = \frac{1}{f_{k+1,1}} - \frac{1}{\alpha_1} \sum_{i=1}^n \widehat{E} \left\{ \int R_i(t) I(t_{k1} \leq t < t_{k+1,1}) \frac{e^{\alpha^T Z_i + b_i^T \widetilde{Z}_i} H''(e^{\alpha^T Z_i + b_i^T \widetilde{Z}_i} A(t))}{H'(e^{\alpha^T Z_i + b_i^T \widetilde{Z}_i} A(t))} dN_i^*(t) \right. \\ \left. - I(t_{k1} \leq Y_i < t_{k+1,1}) e^{\alpha^T Z_i + b_i^T \widetilde{Z}_i} H'(e^{\alpha^T Z_i + b_i^T \widetilde{Z}_i} A(Y_i)) \right\}. \end{aligned} \quad (A3)$$

Since  $A(t) = \theta_1(1 - \sum_{j=k+1}^{n_1} f_{j1})$  for  $t$  between  $t_{k1}$  and  $t_{k+1,1}$ , we can calculate  $a_k$  from  $a_{k+1}, \dots, a_{n_1}$  and  $\theta_1$ . Likewise, we can obtain both forward and backward recursive formulae for estimating  $\lambda_1, \lambda_2, \dots$ . Specifically,

$$\begin{aligned} \frac{1}{\lambda_{k+1}} = \frac{1}{\lambda_k} + \sum_{i=1}^n I(t_{k2} \leq Y_i < t_{k+1,2}) \widehat{E} \left\{ \Delta_i \frac{e^{\beta^T Z_i + b_i^T (\phi \circ \widetilde{Z}_i)} G''(e^{\beta^T Z_i + b_i^T (\phi \circ \widetilde{Z}_i)} \Lambda(Y_i))}{G'(e^{\beta^T Z_i + b_i^T (\phi \circ \widetilde{Z}_i)} \Lambda(Y_i))} \right. \\ \left. - e^{\beta^T Z_i + b_i^T (\phi \circ \widetilde{Z}_i)} G'(e^{\beta^T Z_i + b_i^T (\phi \circ \widetilde{Z}_i)} \Lambda(Y_i)) \right\}, \end{aligned} \quad (A4)$$

and

$$\begin{aligned} \frac{1}{f_{k2}} = \frac{1}{f_{k+1,2}} - \frac{1}{\alpha_2} \sum_{i=1}^n I(t_{k2} \leq Y_i < t_{k+1,2}) \widehat{E} \left\{ \Delta_i \frac{e^{\beta^T Z_i + b_i^T (\phi \circ \widetilde{Z}_i)} G''(e^{\beta^T Z_i + b_i^T (\phi \circ \widetilde{Z}_i)} \Lambda(Y_i))}{G'(e^{\beta^T Z_i + b_i^T (\phi \circ \widetilde{Z}_i)} \Lambda(Y_i))} \right. \\ \left. - e^{\beta^T Z_i + b_i^T (\phi \circ \widetilde{Z}_i)} G'(e^{\beta^T Z_i + b_i^T (\phi \circ \widetilde{Z}_i)} \Lambda(Y_i)) \right\} \end{aligned} \quad (A5)$$

where  $f_{k2} = \lambda_k/\theta_2$ ,  $\theta_2 = \Lambda(t_{n_2,2})$ , and  $G''(x) = d^2G(x)/dx^2$ .

Using the forward recursive formulae (A2) and (A4), the maximization of (A1) over  $\alpha$ ,  $\beta$ ,  $\phi$ ,  $\gamma$  and all the jump sizes of  $A$  and  $\Lambda$  becomes the maximization over  $\alpha$ ,  $\beta$ ,  $\phi$ ,  $\gamma$ ,  $a_1$  and  $\lambda_1$ . Likewise, using the backward recursive formulae (A3) and (A5), the maximization is over  $\alpha$ ,  $\beta$ ,  $\phi$ ,  $\gamma$ ,  $\theta_1$ ,  $\theta_2$ ,  $f_{n_1}$  and  $f_{n_2}$ . In either way, we reduce the large number of parameters to only a small number in the maximization of (A1). The Newton-Raphson algorithm can be used to update the estimates in the M-step. We iterate between the E-step and the M-step until convergence to obtain the NPMLEs. The EM algorithm also works for time-dependent covariates, although the above recursive formulae are no longer applicable.

## Web Appendix B

### *Asymptotic Properties*

Let  $\alpha_0$ ,  $\beta_0$ ,  $\phi_0$ ,  $\gamma_0$ ,  $A_0(t)$  and  $\Lambda_0(t)$  denote the true parameter values. We wish to show that the NPMLEs  $\hat{\alpha}$ ,  $\hat{\beta}$ ,  $\hat{\phi}$ ,  $\hat{\gamma}$ ,  $\hat{A}(\cdot)$  and  $\hat{\Lambda}(\cdot)$  are consistent and

$$n^{1/2} \begin{bmatrix} \hat{\alpha} - \alpha_0 \\ \hat{\beta} - \beta_0 \\ \hat{\phi} - \phi_0 \\ \hat{\gamma} - \gamma_0 \\ \hat{A}(\cdot) - A_0(\cdot) \\ \hat{\Lambda}(\cdot) - \Lambda_0(\cdot) \end{bmatrix}$$

converges weakly to a zero-mean Gaussian process in  $R^d \times BV[0, \tau] \times BV[0, \tau]$ , where  $d$  is the dimension of  $(\alpha^T, \beta^T, \phi^T, \gamma^T)$ , and  $BV[0, \tau]$  denotes the space of all functions with bounded variations in  $[0, \tau]$ . We also wish to show that  $(\hat{\alpha}^T, \hat{\beta}^T, \hat{\phi}^T, \hat{\gamma}^T)$  is asymptotically efficient and that the inverse observed information matrix is a consistent estimator of the limiting covariance matrix.

We impose the following conditions.

(D1) The parameter value  $(\alpha_0^T, \beta_0^T, \phi_0^T, \gamma_0^T)^T$  belongs to the interior of a compact set  $\Theta$  in  $R^d$ , and  $A'_0(t) > 0$  and  $\Lambda'_0(t) > 0$  for all  $t \in [0, \tau]$ .

(D2) With probability one,  $Z_i(\cdot)$  is left-continuous with uniformly bounded left- and right-

derivatives in  $[0, \tau]$ .

(D3) With probability one,  $P(C_i \geq \tau | Z_i) > \delta_0 > 0$  for some constant  $\delta_0$ .

(D4) With probability one,  $E[N_i^*(\tau)] < \infty$ .

(D5) The transformation functions  $H(\cdot)$  and  $G(\cdot)$  are four-times differentiable with  $H(0) = G(0) = 0$ ,  $H'(0) > 0$  and  $G'(0) > 0$ . In addition, there exist constants  $\mu_0 > 0$  and  $\kappa_0 > 0$  such that for any integer  $m \geq 0$  and any sequence  $0 < x_1 < \dots < x_m \leq y$ ,

$$\prod_{l=1}^m \{(1 + x_l)H'(x_l)\} \exp\{-H(y)\} \leq \mu_0^m (1 + y)^{-\kappa_0}$$

and

$$(1 + x)G'(x) \exp\{-G(x)\} \leq \mu_0(1 + x)^{-\kappa_0}.$$

There also exists a constant  $\rho_0$  such that

$$\sup_x \left\{ \frac{|H''(x)| + |H^{(3)}(x)| + |H^{(4)}(x)|}{H'(x)(1 + x)^{\rho_0}} \right\} + \sup_x \left\{ \frac{|G''(x)| + |G^{(3)}(x)| + |G^{(4)}(x)|}{G'(x)(1 + x)^{\rho_0}} \right\} < \infty,$$

where  $H^{(3)}$ ,  $G^{(3)}$ ,  $H^{(4)}$  and  $G^{(4)}$  denote the third and fourth derivatives.

(D6) For any constant  $c_0 > 0$ ,

$$\sup_{\gamma} E \left[ \int_b \exp\{c_0(N_i^*(\tau) + 1)|b|\} f(b; \gamma) db \right] < \infty,$$

and

$$\left| \frac{\partial f(b; \gamma)/\partial \gamma}{f(b; \gamma)} \right| + \left| \frac{\partial^2 f(b; \gamma)/\partial \gamma^2}{f(b; \gamma)} \right| + \left| \frac{\partial^3 f(b; \gamma)/\partial \gamma^3}{f(b; \gamma)} \right| \leq \exp\{c_0(1 + |b|)\},$$

(D7) If there exist  $c(t)$  and  $v$  such that  $c(t) + v^T Z(t) = 0$  with probability 1, then  $c(t) = 0$  and  $v = 0$ . In addition, there exists some  $t \in [0, \tau]$  such that  $\{\tilde{Z}(t)\}$  spans the whole space of  $b$ .

(D8)  $f(b; \gamma) = f(b; \gamma_0)$  almost surely if and only if  $\gamma = \gamma_0$ . In addition, if  $v^T f'(b; \gamma_0) = 0$  almost surely, then  $v = 0$ .

It can be easily verified that condition (D5) holds for all commonly used transformations, including the classes of Box-Cox and logarithmic transformations and that (D6) and (D8) hold for normal and many other distributions. Condition (D7) entails the linear independence of covariates, which is a natural requirement in regression analysis.

The desired asymptotic properties will hold if we can verify that conditions (C1)-(C8) in Appendix B of Zeng and Lin (2007) hold under our conditions (D1)-(D8). It follows from the arguments in Appendix B of Zeng and Lin (2007) that our conditions (D1)-(D8) imply (C1)-(C4), (C6) and (C8) of Zeng and Lin (2007). It remains to verify the two identifiability conditions (C5) and (C7) of Zeng and Lin (2007).

We first verify (C5). Suppose that  $(\alpha, \beta, \phi, \gamma, A, \Lambda)$  yields the same likelihood as  $(\alpha_0, \beta_0, \phi_0, \gamma_0, A_0, \Lambda_0)$ . That is,

$$\begin{aligned}
& \int_b \left[ \prod_t \left\{ a(t) e^{\alpha^T Z_i(t) + b^T \tilde{Z}_i(t)} H'(q_1(t)) \right\}^{R_i(t) \Delta N_i^*(t)} e^{-H(q_1(Y_i))} \right] \\
& \times \left[ \left\{ \lambda(Y_i) e^{\beta^T Z_i(Y_i) + b^T (\phi \circ \tilde{Z}_i(Y_i))} G'(q_2(Y_i)) \right\}^{\Delta_i} e^{-G(q_2(Y_i))} \right] f(b; \gamma) db \\
& = \int_b \left[ \prod_t \left\{ a_0(t) e^{\alpha_0^T Z_i(t) + b^T \tilde{Z}_i(t)} H'(q_{01}(t)) \right\}^{R_i(t) \Delta N_i^*(t)} e^{-H(q_{01}(Y_i))} \right] \\
& \times \left[ \left\{ \lambda_0(Y_i) e^{\beta_0^T Z_i(Y_i) + b^T (\phi_0 \circ \tilde{Z}_i(Y_i))} G'(q_{02}(Y_i)) \right\}^{\Delta_i} e^{-G(q_{02}(Y_i))} \right] f(b; \gamma_0) db, \tag{A6}
\end{aligned}$$

where  $q_1(t) = \int_0^t e^{\alpha^T Z(s) + b^T \tilde{Z}(s)} dA(s)$ ,  $q_2(t) = \int_0^t e^{\beta^T Z(s) + b^T (\phi \circ \tilde{Z}(s))} d\Lambda(s)$ , and  $q_{01}$  and  $q_{02}$  are  $q_1$  and  $q_2$  evaluated at the true parameter values. We take the following actions on both sides of (A6):

(i) For the terminal event, we obtain an equation from (A6) by setting  $\Delta = 0$  and  $Y = \tau$ ; we obtain a second equation by integrating  $t$  from  $t_2$  to  $\tau$  on both sides under  $\Delta = 1$  and  $Y = t$ . We then take the difference between these two equations.

(ii) For the recurrent events, we let  $R(t) = 1$  and let  $N^*(t)$  have jumps at  $s_1, s_2, \dots, s_m$  and  $s'_1, \dots, s'_{m'}$  for any arbitrary  $(m + m')$  times in  $[0, \tau]$ . We integrate  $l_1$  of  $s_1, \dots, s_m$  from 0 to  $t_{11}$ ,  $l_2$  of them from 0 to  $t_{12}$ ,  $\dots$ ,  $l_K$  of them from 0 to  $t_{1K}$ , and integrate  $s'_1, \dots, s'_{m'}$  from 0 to  $t_2$ . We then multiply both sides by  $\{\prod_k (i\omega_{1k})^{l_k} / \prod_k l_k!\} / m'!$  and sum over  $l_1, \dots, l_K, m' = 0, 1, \dots$

After these sequential operations, we obtain

$$\int_b \exp \left\{ \sum_{k=1}^K i\omega_k H(q_1(t_{1k})) \right\} \exp \{-G(q_2(t_2))\} f(b; \gamma) db$$

$$= \int_b \exp\left\{\sum_{k=1}^K i\omega_k H(q_{01}(t_{1k}))\right\} \exp\{-G(q_{02}(t_2))\} f(b; \gamma_0) db. \quad (A7)$$

With  $t_2 = 0$ , this equation implies that  $H(q_1(t_{1k}))$  ( $k = 1, \dots, K$ ) as a function of  $b_1 \sim f(b; \gamma)$  and  $H(q_{01}(t_{1k}))$  ( $k = 1, \dots, K$ ) as a function of  $b_2 \sim f(b; \gamma_0)$  have the same distribution, and so is true for  $q_1(t_{1k})$  ( $k = 1, \dots, K$ ) and  $q_{01}(t_{1k})$  ( $k = 1, \dots, K$ ) because of the one-to-one mapping. Thus,  $\log q'_1(t_{1k})$  ( $k = 1, \dots, K$ ) and  $\log q'_{01}(t_{1k})$  ( $k = 1, \dots, K$ ) must also have the same distribution. Because  $E[b_1] = E[b_2] = 0$ , we obtain  $\log a(t) + Z(t)^T \alpha = \log a_0(t) + Z(t)^T \alpha_0$ . It follows from (D7) that  $a(t) = a_0(t)$  and  $\alpha = \alpha_0$ . In addition,  $b_1^T \tilde{Z}(t_{1k})$  ( $k = 1, \dots, K$ ) and  $b_2^T \tilde{Z}(t_{1k})$  ( $k = 1, \dots, K$ ) have the same distribution. Since  $\tilde{Z}(t)$  spans the space for  $b$ ,  $b_1$  and  $b_2$  must have the same distribution. It then follows from (D8) that  $\gamma = \gamma_0$ . The foregoing arguments also imply that  $b_1 \sim \exp\{-G(q_2(t_2))\} f(b; \gamma)$  and  $b_2 \sim \exp\{-G(q_{02}(t_2))\} f(b; \gamma_0)$  have the same distribution. Thus,  $\exp\{-G(q_2(t_2))\} f(b; \gamma) = \exp\{-G(q_{02}(t_2))\} f(b; \gamma_0)$ . That is,  $\log \lambda(t) + \beta^T Z(t) + b^T (\phi \circ \tilde{Z}(t)) = \log \lambda_0(t) + \beta_0^T Z(t) + b^T (\phi_0 \circ \tilde{Z}(t))$ . Taking the expectation with respect to  $b$ , we see that  $\lambda = \lambda_0$  and  $\beta = \beta_0$ . Clearly,  $\phi = \phi_0$ .

To verify (C7) of Zeng and Lin (2007), we write out the score equation along the path  $(\alpha_0 + \epsilon v_1, \beta_0 + \epsilon v_2, \gamma_0 + \epsilon v_\gamma, \phi_0 + \epsilon v_3, A_0 + \epsilon \int h_1 dA_0, \Lambda_0 + \epsilon \int h_2 d\Lambda_0)$ . We perform operations (i) and (ii) on the score equation to obtain

$$\int_b \left[ \sum_{k=1}^K i\omega_k A_1(t_{1k}, b) - A_2(t_2, b) + \frac{f'(b; \gamma_0)^T v_\gamma}{f(b; \gamma_0)} \right] \exp \left\{ \sum_{k=1}^K i\omega_k H(q_{01}(t_{1k})) - G(q_{02}(t_2)) \right\} \times f(b; \gamma_0) db = 0, \quad (A8)$$

where  $A_1(t, b) = \int_0^t (h_1(s) + v_1^T Z(s) + b^T (v_1 \circ \tilde{Z}(s))) q'_{01}(s) ds H'(q_{01}(t)) H(q_{01}(t))$ , and  $A_2(t, b) = \int_0^t (h_2(s) + v_2^T Z(s) + b^T (v_2 \circ \tilde{Z}(s))) q'_{02}(s) ds G'(q_{02}(t)) G(q_{02}(t))$ . Applying the Fourier transformation to both sides yields that for  $b \sim f(b; \gamma_0)$ ,

$$\begin{aligned} & \sum_{k=1}^K \frac{\partial}{\partial g_k} E_b \left[ A_1(t_{1k}, b) \middle| H(q_{01}(t_{11})) = g_1, \dots, H(q_{01}(t_{1K})) = g_K \right] f(g_1, \dots, g_K) \\ & - E_b \left[ A_2(t_2, b) \middle| H(q_{01}(t_{11})) = g_1, \dots, H(q_{01}(t_{1K})) = g_K \right] f(g_1, \dots, g_K) \\ & + E_b \left[ \frac{f'(b; \gamma_0)^T v_\gamma}{f(b; \gamma_0)} \middle| H(q_{01}(t_{11})) = g_1, \dots, H(q_{01}(t_{1K})) = g_K \right] f(g_1, \dots, g_K) = 0, \end{aligned}$$

where  $f(g_1, \dots, g_K)$  is the joint density of  $H(q_{01}(t_{11})), \dots, G_K(q_{01}(t_{1K}))$ . We integrate out  $g_1, \dots, g_K$  and set  $t_2 = 0$ . Note that the last term is zero and the remainder is a homogeneous equation for  $v_1^T Z(t_{1k}) + h_1(t_{1k})$  ( $k = 1, \dots, K$ ), which has a trivial solution. By condition (D7),  $v_1 = 0$  and  $h_1 = 0$ . Then (A8) becomes

$$\int_b \left[ -A_2(t_2, b) + \frac{f'(b; \gamma_0)^T v_\gamma}{f(b; \gamma_0)} \right] \exp \left\{ \sum_{k=1}^K i\omega_k H(q_{01}(t_{1k})) - G(q_{02}(t_2)) \right\} f(b; \gamma_0) db = 0.$$

By the arguments used in proving the identifiability, we obtain

$$-A_2(t_2, b) + \frac{f'(b; \gamma_0)^T v_\gamma}{f(b; \gamma_0)} = 0.$$

Clearly,  $f'(b; \gamma_0)^T v_\gamma = 0$ , so it follows from condition (D8) that  $v_\gamma = 0$ . Thus,  $v_2^T Z(t_2) + h_2(t) + b^T(v_3 \circ \tilde{Z}(t)) = 0$ , implying that  $v_2 = 0$ ,  $h_2 = 0$  and  $v_3 = 0$ .
